# Supplementary material for: Photoluminescence of crystals of the isomers d -(−)-arabinose and l -(+)-arabinose, and insights into its mechanism
Source: Royal Society of Chemistry journal article supplement (doi:10.1039/d5cp03220b), 2025-01-01
Supplement: d5cp03220b2.pdf [file d5cp03220b2.pdf]

## Supporting Information

# Photoluminescence of crystals of the isomers D-(-)-arabinose and L-(+)-arabinose, and insights into its mechanism

Qingfeng Wu<sup>a</sup>, Chuchu Li<sup>a</sup>, Xintong Li<sup>a</sup>, Yuting Xiao<sup>a</sup>, Qin Ding<sup>a</sup>, Qing Zhou<sup>\*a,b,c</sup>

<sup>a</sup> Qingfeng Wu, Chuchu Li, Xintong Li, Yuting Xiao, Qin Ding, Dr. Q. Zhou

Engineering Research Center for Eco-Dyeing and Finishing of Textiles, Key Laboratory of Advanced Textile Materials and Manufacturing Technology, Ministry of Education, College of Textile Science and Engineering (International Institute of Silk), Zhejiang Sci-Tech University, Hangzhou 310018, People's Republic of China

<sup>b</sup> Dr. Q. Zhou,

Zhejiang Sci-Tech University Shaoxing-Keqiao Research Institute, Building 8, Cross border E-commerce Park, Huashe Street, Keqiao District, Shaoxing City, Zhejiang, 312030, China

<sup>c</sup> Dr. Q. Zhou

Zhejiang Provincial Innovation Center of Advanced Textile Technology, Building 7, Cross border E-commerce Park, Huashe Street, Keqiao District, Shaoxing City, Zhejiang, 312030, China

### **Methods**

#### **Materials**

D-(-)-Arabinos (D-Arb, 99%), L-(+)-Arabinos (L-Arb, 99%) and anhydrous ethanol (99.9%), which were purchased from Adamas-Beta Reagent Co. Purified water was purchased from Hangzhou Wahaha Group Co., Ltd and used as receive.

#### **Purification of samples**

D-(-)-Arabinose and L-(+)-Arabinose were initially dissolved in distilled water at room temperature, followed by the addition of ethanol (water/ethanol, v/v =1:20) to induce precipitation. The precipitate was collected via filtration through a sintered glass funnel and dried overnight in a vacuum oven at 40 °C.

#### **Single crystal cultivation**

Saturated aqueous solutions of D/L-Arb were made and placed in culture dishes

for slow evaporation of water at room temperature.

### ***Instrumentation.***

<sup>1</sup>H NMR spectra was obtained from AVANCE III HD 400MHz (Bruker BioSpin GmbH, Rheinstetten, Germany). The photoluminescence (PL) spectra of samples of the same quality were obtained with the fluorescence spectrophotometer (F-46001, Japan). Delayed PL spectra of solids at room temperature and phosphorescence lifetimes were measured on an Edinburgh FLS1000 fluorescence spectrometer. Photoluminescence quantum yields (PLQY) of solids were measured on Horiba FluoroMax-4 spectrophotometer equipped with Quanta-φ F-3029 integrating sphere. . Crystallography data for D-Arb and L-Arb were collected on a Bruker D8 Venture-CMOS diffractometer with CuK X-ray source radiation ( $\lambda = 1.54184 \text{ \AA}$ ) at room temperature in the  $\omega$  scan mode. Luminescent photographs and the videos were recorded using a camera (Sony A7S2, Japan) and the afterglow images were captured from the videos.

### **Computational study**

ORCA5.0.3program<sup>1</sup> was utilized to perform the DFT calculations with this fundamentals and functionals (!B3LYP D3 def2-TZVP(-f) def2/J RIJCOSX). The frontier molecular orbitals (FMO) were obtained via Multiwfn (Version 3.8(dev))<sup>2, 3</sup> and VMD version 1.9.3 (November 30, 2016)<sup>4</sup> .

Methods of Ab initio molecular dynamics (AIMD): AIMD simulations of this system were calculated at the B97–3c level with ORCA 5.0.3, and the dynamic trajectories were visualized by VMD software. 2000 fs trajectories of D/L-Arb dimers were simulated at 298.15 K. The variation of dynamic distance between oxygen atom can be shown by VMD.

Calculation criteria for H-bonds: (1) The distance of X-H···Y should be less than 3.5 Å; (2) The angle between X-H in the hydrogen bond donor and Y on the hydrogen bond acceptor should be <30 degrees.

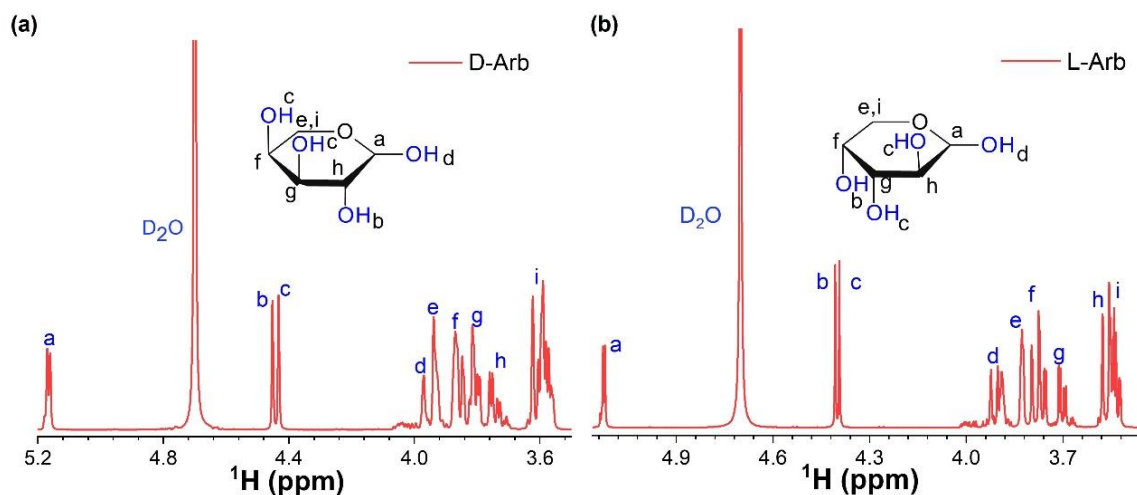

**Fig. S1**  $^1\text{H}$  NMR of (a)D-Arb and (b)L-Arb.

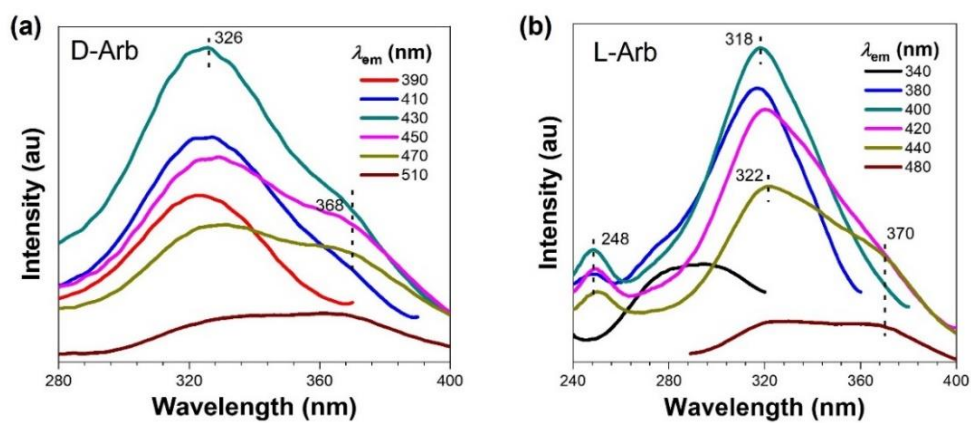

**Fig. S2** Excitation spectra of (a)D-Arb and (b)L-Arb crystals under different  $\lambda_{\text{em}}$

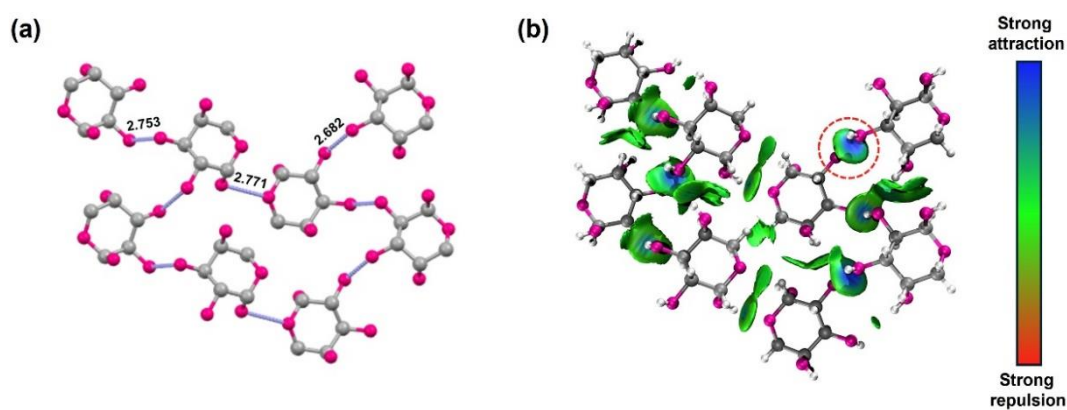

**Fig. S3** (a)Single-crystal structure fragmental molecular packing with denoted intermolecular short contacts among electron-rich units of L-Arb. (b) NCI plots of L-Arb

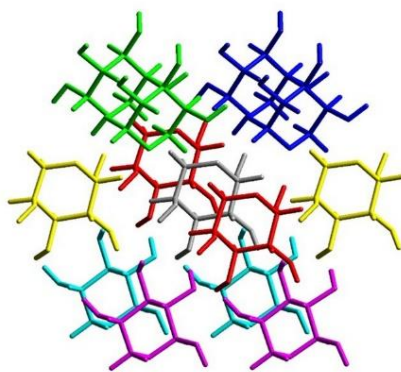

**Fig. S4** Cluster of L-Arb extracted from its single-crystal structure Molecules are colored according to their pairwise interaction with the central molecule (colored grey).

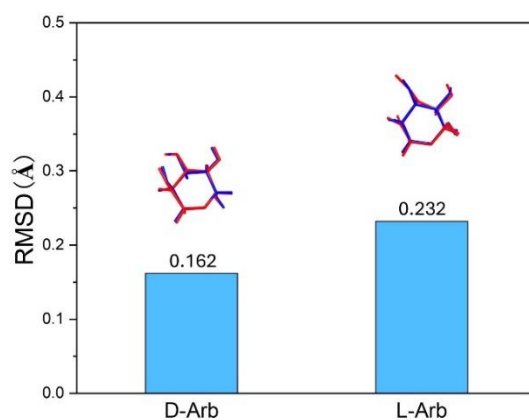

**Fig. S5** The RMSD values of the atomic positions were calculated to evaluate the strength of intramolecular motion in two different states (ground-state (blue colour) and excited-state S1 (red colour) geometries of D/L-Arb molecule.

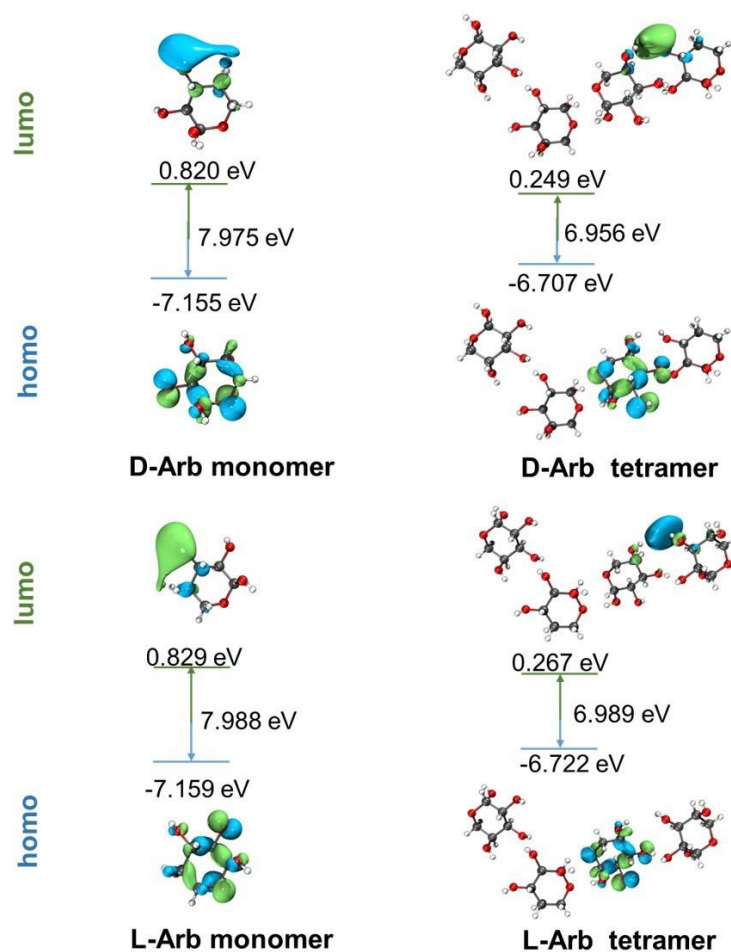

**Fig. S6** Frontier molecular orbitals of D/L-Arb monomer, tetramer based on the ground-state geometries in the crystalline phase iso-value = 0.05

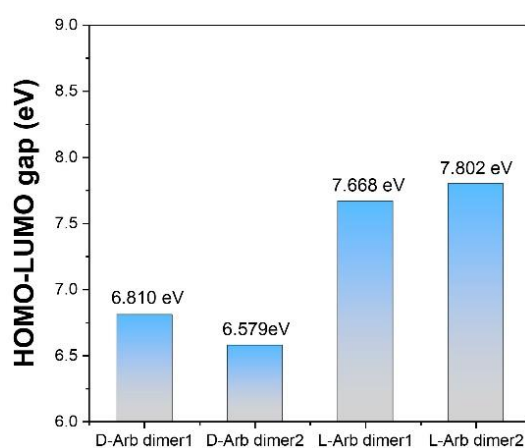

**Fig. S7** HOMO-LUMO gap of D-Arb dimer1, D-Arb dimer2, L-Arb dimer1, L-Arb dimer2

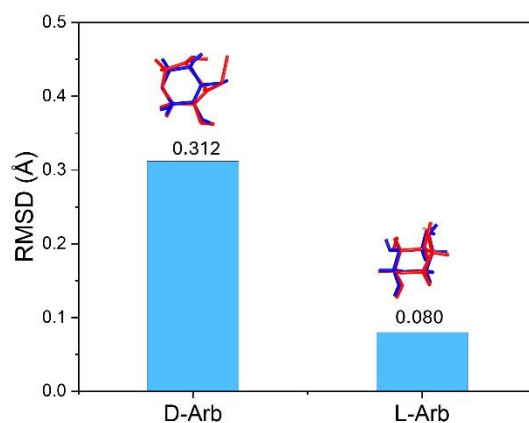

**Fig. S8** The RMSD values of the atomic positions were calculated to evaluate the strength of intramolecular motion in two different states (ground-state (blue colour) and excited-state T1 (red colour) geometries of D/L-Arb molecule.

| Name                                           | D-Arabinose                                                   |
|------------------------------------------------|---------------------------------------------------------------|
| CCDC                                           | 2399877                                                       |
| Empirical formula                              | C <sub>5</sub> H <sub>10</sub> O <sub>5</sub>                 |
| Formula weight                                 | 150.13                                                        |
| Temperature/K                                  | 299.44(10)                                                    |
| Crystal system                                 | orthorhombic                                                  |
| Space group                                    | P2 <sub>1</sub> 2 <sub>1</sub> 2 <sub>1</sub>                 |
| a/Å                                            | 4.8396(3)                                                     |
| b/Å                                            | 6.5160(3)                                                     |
| c/Å                                            | 19.4563(12)                                                   |
| $\alpha/^\circ$                                | 90                                                            |
| $\beta/^\circ$                                 | 90                                                            |
| $\gamma/^\circ$                                | 90                                                            |
| Volume/Å <sup>3</sup>                          | 613.55(6)                                                     |
| Z                                              | 4                                                             |
| $\rho_{\text{calc}}/\text{cm}^3$               | 1.625                                                         |
| $\mu/\text{mm}^{-1}$                           | 0.147                                                         |
| F (000)                                        | 320.0                                                         |
| Crystal size/mm <sup>3</sup>                   | 0.1 × 0.1 × 0.1                                               |
| Radiation                                      | Mo K $\alpha$ ( $\lambda$ = 0.71073)                          |
| 2 $\Theta$ range for data collection/ $^\circ$ | 4.186 to 50.216                                               |
| Index ranges                                   | -4 ≤ h ≤ 5, -7 ≤ k ≤ 6, -23 ≤ l ≤ 19                          |
| Reflections collected                          | 2748                                                          |
| Independent reflections                        | 1091 [R <sub>int</sub> = 0.0221, R <sub>sigma</sub> = 0.0274] |
| Data/restraints/parameters                     | 1091/0/95                                                     |
| Goodness-of-fit on F <sup>2</sup>              | 1.074                                                         |
| Final R indexes [I ≥ 2 $\sigma$ (I)]           | R <sub>1</sub> = 0.0312, wR <sub>2</sub> = 0.0738             |
| Final R indexes [all data]                     | R <sub>1</sub> = 0.0346, wR <sub>2</sub> = 0.0759             |
| Largest diff. peak/hole / e Å <sup>-3</sup>    | 0.13/-0.17                                                    |
| Flack parameter                                | -1.5(8)                                                       |

**Table. S1** Single crystal analysis report of D-Arb crystal data and structure refinement

CCDC2399877

| Name                                           | L-Arabinose                                                    |
|------------------------------------------------|----------------------------------------------------------------|
| CCDC                                           | 2399878                                                        |
| Empirical formula                              | C <sub>5</sub> H <sub>10</sub> O <sub>5</sub>                  |
| Formula weight                                 | 150.13                                                         |
| Temperature/K                                  | 299.50(10)                                                     |
| Crystal system                                 | orthorhombic                                                   |
| Space group                                    | P2 <sub>1</sub> 2 <sub>1</sub> 2 <sub>1</sub>                  |
| a/Å                                            | 4.8438(2)                                                      |
| b/Å                                            | 6.5220(4)                                                      |
| c/Å                                            | 19.4436(12)                                                    |
| $\alpha/^\circ$                                | 90                                                             |
| $\beta/^\circ$                                 | 90                                                             |
| $\gamma/^\circ$                                | 90                                                             |
| Volume/Å <sup>3</sup>                          | 614.25(6)                                                      |
| Z                                              | 4                                                              |
| $\rho_{\text{calc}}/\text{g cm}^{-3}$          | 1.623                                                          |
| $\mu/\text{mm}^{-1}$                           | 0.147                                                          |
| F (000)                                        | 320.0                                                          |
| Crystal size/mm <sup>3</sup>                   | 0.1 × 0.1 × 0.1                                                |
| Radiation                                      | Mo K $\alpha$ ( $\lambda$ = 0.71073)                           |
| 2 $\Theta$ range for data collection/ $^\circ$ | 4.19 to 50.184                                                 |
| Index ranges                                   | -5 ≤ h ≤ 5, -5 ≤ k ≤ 7, -22 ≤ l ≤ 23                           |
| Reflections collected                          | 2698                                                           |
| Independent reflections                        | 1091 [ $R_{\text{int}}$ = 0.0254, $R_{\text{sigma}}$ = 0.0344] |
| Data/restraints/parameters                     | 1091/0/95                                                      |
| Goodness-of-fit on F <sup>2</sup>              | 1.079                                                          |
| Final R indexes [ $I \geq 2\sigma(I)$ ]        | $R_1$ = 0.0352, $wR_2$ = 0.0780                                |
| Final R indexes [all data]                     | $R_1$ = 0.0400, $wR_2$ = 0.0814                                |
| Largest diff. peak/hole / e Å <sup>-3</sup>    | 0.15/-0.18                                                     |
| Flack parameter                                | -0.7(10)                                                       |

**Table. S2** Single crystal analysis report of L-Arb crystal data and structure refinement

CCDC2399878

| N | Symop             | R    | Electron Density   | E_ele | E_pol | E_dis | E_rep | E_tot |
|---|-------------------|------|--------------------|-------|-------|-------|-------|-------|
| 2 | x, y, z           | 4.84 | B3LYP/6-31G (d, p) | -12.8 | -3.9  | -22.7 | 16.6  | -25.9 |
| 2 | x, y, z           | 6.52 | B3LYP/6-31G (d, p) | -17.8 | -5.3  | -17.5 | 20.0  | -25.7 |
| 2 | -x, y+1/2, -z+1/2 | 6.40 | B3LYP/6-31G (d, p) | -51.4 | -9.7  | -13.0 | 58.5  | -36.7 |
| 2 | -x, y+1/2, -z+1/2 | 5.95 | B3LYP/6-31G (d, p) | -40.5 | -11.6 | -19.0 | 51.7  | -36.1 |
| 2 | x+1/2, -y+1/2, -z | 6.17 | B3LYP/6-31G (d, p) | -40.7 | -8.5  | -15.0 | 46.2  | -33.9 |
| 2 | x+1/2, -y+1/2, -z | 6.94 | B3LYP/6-31G (d, p) | -1.5  | -1.2  | -9.0  | 5.0   | -7.1  |

**Table. S3** D-Arb crystals use CE-B3LYP in CrystalExplorer to calculate the unit of energy for pomewise interaction between molecules as kJ/mol, R= 3.22 Å

| N | Symop             | R    | Electron Density   | E_ele | E_pol | E_dis | E_rep | E_tot |
|---|-------------------|------|--------------------|-------|-------|-------|-------|-------|
| 2 | x, y, z           | 4.84 | B3LYP/6-31G (d, p) | -12.7 | -3.8  | -22.6 | 16.4  | -25.8 |
| 2 | x, y, z           | 6.52 | B3LYP/6-31G (d, p) | -15.7 | -4.9  | -17.2 | 18.6  | -23.7 |
| 2 | x+1/2, -y+1/2, -z | 6.94 | B3LYP/6-31G (d, p) | -1.2  | -1.2  | -9.1  | 5.1   | -6.9  |
| 2 | -x, y+1/2, -z+1/2 | 5.95 | B3LYP/6-31G (d, p) | -40.5 | -11.5 | -19.0 | 50.6  | -36.6 |
| 2 | x+1/2, -y+1/2, -z | 6.17 | B3LYP/6-31G (d, p) | -41.1 | -8.5  | -15.1 | 46.9  | -34.0 |
| 2 | -x, y+1/2, -z+1/2 | 6.41 | B3LYP/6-31G (d, p) | -51.6 | -9.7  | -13.1 | 58.8  | -36.9 |

**Table. S4** L-Arb crystals use CE-B3LYP in CrystalExplorer to calculate the unit of energy for pomewise interaction between molecules as kJ/mol, R= 3.22 Å

| D-Arb    | Excited state | Excitation energy (eV) | f       | Transition configuration                                                                                |
|----------|---------------|------------------------|---------|---------------------------------------------------------------------------------------------------------|
| monomer  | S1            | 7.093                  | 0.00358 | H - 1 → L (85.5%), H → L (10.2%)                                                                        |
|          | S2            | 7.199                  | 0.01228 | H → L (85.3%), H - 1 → L (9.8%)                                                                         |
|          | S3            | 7.566                  | 0.0221  | H → L + 1 (58.1%), H → L + 2 (30.6%)                                                                    |
|          | S4            | 7.644                  | 0.00547 | H → L + 2 (52.8%), H → L + 1 (34.7%)                                                                    |
|          | S5            | 7.836                  | 0.00885 | H - 1 → L + 2 (38.1%), H - 1 → L + 3 (23.7%), H - 1 → L + 1 (17.5%), H - 3 → L (9.3%)                   |
|          | T1            | 6.911                  |         | H - 1 → L (84.0%), H → L (5.9%)                                                                         |
|          | T2            | 7.116                  |         | H → L (81.6%), H - 1 → L (5.9%)                                                                         |
|          | T3            | 7.324                  |         | H → L + 2 (54.4%), H → L + 1 (18.1%), H → L (6.9%)                                                      |
|          | T4            | 7.471                  |         | H → L + 1 (66.6%), H → L + 2 (15.2%)                                                                    |
|          | T5            | 7.579                  |         | H - 1 → L + 3 (33.9%), H - 1 → L + 2 (23.0%), H - 3 → L (13.5%), H - 1 → L + 1 (7.0%), H - 4 → L (5.3%) |
| tetramer | S1            | 6.254                  | 0.01686 | H-1 → L (50.0%), H → L (46.8%)                                                                          |
|          | S2            | 6.426                  | 0.01284 | H → L (51.1%), H-1 → L (46.0%)                                                                          |
|          | S3            | 6.839                  | 0.00409 | H-2 → L+1 (85.6%), H-2 → L (5.7%)                                                                       |
|          | S4            | 6.92                   | 0.0007  | H → L+1 (49.7%), H → L+3 (29.5%), H → L+2 (12.1%)                                                       |
|          | S5            | 6.93                   | 0.00069 | H-2 → L (89.5%)                                                                                         |
|          | T1            | 6.159                  |         | H-1 → L (52.3%), H → L (42.3%)                                                                          |
|          | T2            | 6.381                  |         | H → L (54.3%), H-1 → L (41.4%)                                                                          |
|          | T3            | 6.744                  |         | H-2 → L+1 (75.7%), H-5 → L+1 (6.2%)                                                                     |
|          | T4            | 6.788                  |         | H-8 → L (76.5%), H-6 → L (6.4%), H-7 → L (6.3%)                                                         |
|          | T5            | 6.9                    |         | H → L+1 (37.8%), H → L+3 (30.6%), H → L+2 (12.3%), H-2 → L (5.9%)                                       |

**Table. S5** Transition configurations of D-Arb monomer and tetramer.

| L-Arb    | Excited state | Excitation energy (eV) | f       | Transition configuration                                                                |
|----------|---------------|------------------------|---------|-----------------------------------------------------------------------------------------|
| monomer  | S1            | 7.113                  | 0.00542 | H-1 → L (68.2%), H → L (27.6%)                                                          |
|          | S2            | 7.222                  | 0.00918 | H → L (67.5%), H-1 → L (26.7%)                                                          |
|          | S3            | 7.56                   | 0.02364 | H → L+1 (57.1%), H → L+2 (32.3%)                                                        |
|          | S4            | 7.644                  | 0.00487 | H → L+2 (52.9%), H → L+1 (34.8%)                                                        |
|          | S5            | 7.875                  | 0.00905 | H-1 → L+2 (36.1%), H-1 → L+1 (23.8%), H-1 → L+3 (19.5%), H-3 → L (8.2%)                 |
|          | T1            | 6.932                  |         | H-1 → L (75.4%), H → L (14.3%)                                                          |
|          | T2            | 7.133                  |         | H → L (71.0%), H-1 → L (13.7%), H → L+1 (6.2%)                                          |
|          | T3            | 7.326                  |         | H → L+2 (52.0%), H → L+1 (19.8%), H → L (9.7%)                                          |
|          | T4            | 7.47                   |         | H → L+1 (62.8%), H → L+2 (17.2%)                                                        |
|          | T5            | 7.618                  |         | H-1 → L+3 (37.0%), H-1 → L+2 (19.0%), H-3 → L (13.8%), H-4 → L (7.0%), H-1 → L+1 (6.8%) |
| tetramer | S1            | 6.3                    | 0.01973 | H → L (54.5%), H-1 → L (42.4%)                                                          |
|          | S2            | 6.472                  | 0.01043 | H-1 → L (53.6%), H → L (43.4%)                                                          |
|          | S3            | 6.856                  | 0.00398 | H-2 → L+1 (87.2%)                                                                       |
|          | S4            | 6.926                  | 0.00069 | H → L+1 (49.9%), H → L+3 (27.5%), H → L+2 (14.8%)                                       |
|          | S5            | 6.973                  | 0.0017  | H-8 → L (61.6%), H-7 → L (20.4%), H-2 → L (10.5%)                                       |
|          | T1            | 6.204                  |         | H → L (48.1%), H-1 → L (46.6%)                                                          |
|          | T2            | 6.427                  |         | H → L (48.5%), H-1 → L (47.1%)                                                          |
|          | T3            | 6.759                  |         | H-2 → L+1 (77.5%), H-5 → L+1 (6.1%)                                                     |
|          | T4            | 6.818                  |         | H-8 → L (66.4%), H-7 → L (21.7%)                                                        |
|          | T5            | 6.906                  |         | H → L+1 (41.8%), H → L+3 (31.4%), H → L+2 (17.1%)                                       |

**Table. S6** Transition configurations of L-Arb monomer and tetramer.

## References

1. F. Neese, Software update: The ORCA program system—Version 5.0, *Wiley Interdiscip. Rev.: Comput. Mol. Sci.*, 2022, **12**, e1606.
2. T. Lu and F. Chen, Multiwfn: A multifunctional wavefunction analyzer, *J. Comput. Chem.*, 2012, **33**, 580-592.
3. T. Lu, A comprehensive electron wavefunction analysis toolbox for chemists, Multiwfn, *JCP*, 2024, **161**.
4. W. Humphrey, A. Dalke and K. Schulten, VMD: visual molecular dynamics, *J. Mol. Graphics*, 1996, **14**, 33-38.
